# Supplementary material
Source: publisher site journal article supplement (https://www.spandidos-publications.com/4890/downloadSupplementary)
Supplement: Supplementary file 1 [file downloadSupplementary]

Table SI. Scoring paradigm for mitochondrial ultrastructure.

| Score | Definition (%) <sup>a</sup>   | Membrane         | Cristae      | Matrix     |
|-------|-------------------------------|------------------|--------------|------------|
| 0     | No damage (100%)              | Intact           | Well-defined | Dense      |
| 1     | Slight damage ( $\leq 10\%$ ) | Swollen          | Well-defined | Dense      |
| 2     | Mild damage ( $\leq 50\%$ )   | Swollen/breached | Less defined | Less dense |
| 3     | Severe damage ( $\geq 50\%$ ) | Swollen/breached | Fragmented   | Lucent     |

<sup>a</sup>Percentage of mitochondria affected.
